# Supplementary material for: Self-supported Li3VO4/N doped C fibers for superb high-rate and long-life Li-ion storage
Source: Royal Society of Chemistry journal article supplement (doi:10.1039/d2ta02872g), 2022-01-01
Supplement: d2ta02872g1.pdf [file d2ta02872g1.pdf]

## Self-supported $\text{Li}_3\text{VO}_4/\text{N}$ doped C fibers for superb high-rate and long-life Li-ion storage

Daobo Li<sup>a</sup>, Junlin Lu<sup>a</sup>, Dongmei Zhang<sup>a</sup>, Cunyuan Pei<sup>a</sup>, Ting Xiao<sup>b</sup>, Huijuan Ma<sup>c</sup>, Shibing Ni<sup>a1</sup>

<sup>a</sup>College of Materials and Chemical Engineering, Key Laboratory of Inorganic Nonmetallic Crystalline and Energy Conversion Materials, China Three Gorges University, Yichang, 443002, PR China.

<sup>b</sup>College of Electrical Engineering & New Energy, China Three Gorges University, Yichang, 443002, PR China.

<sup>c</sup>Hubei Three Gorges Laboratory, Yichang, Hubei 443007, PR China

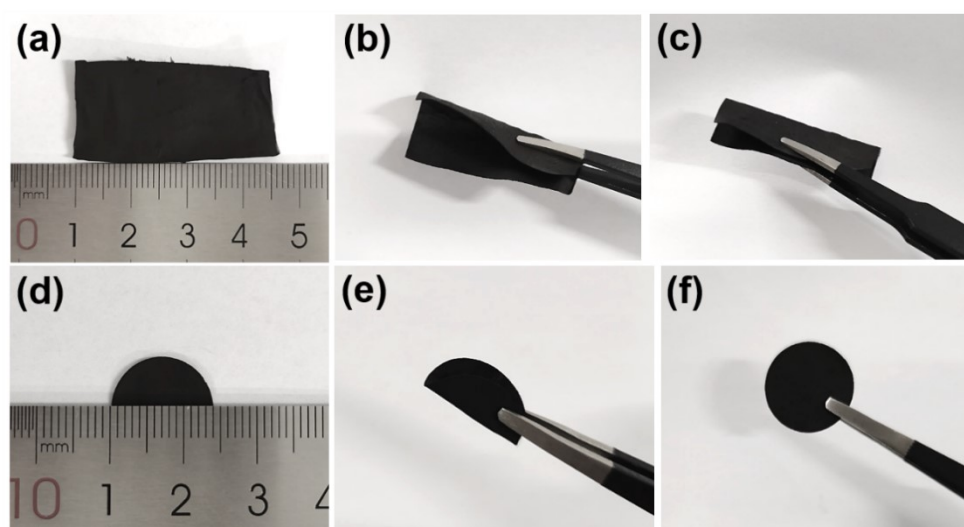

**Fig. S1** (a-f) Digital photos of the SS LVO/NC NFs.

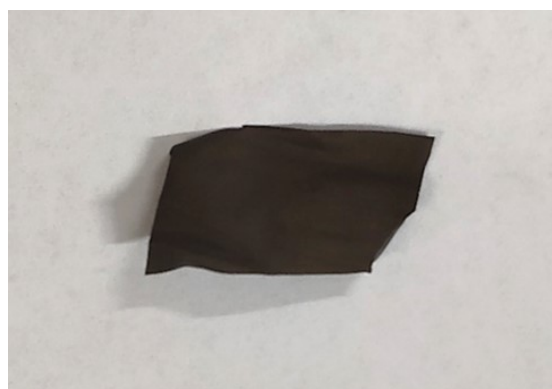

**Fig. S2** Digital photos of the NC NFs without LVO.

<sup>1</sup> Corresponding author. Fax: 86-717-6397505 E-mail: shibingni07@126.com;

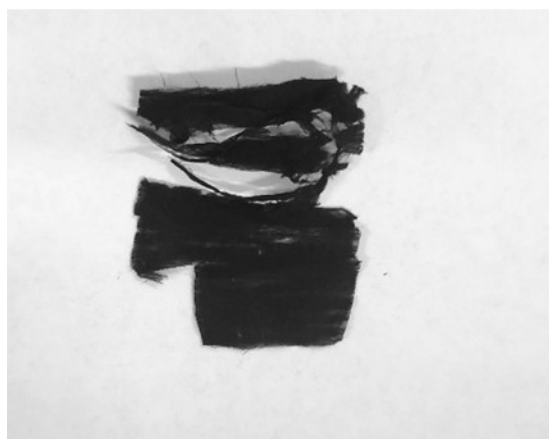

**Fig. S3** Digital photos of the Li and V concentration increasing in the spinning precursor of the LVO/NC NFs.

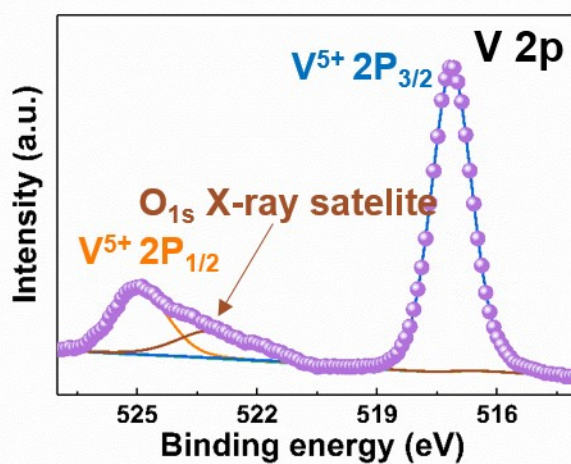

**Fig. S4** High-resolution XPS spectra of V 2p for the SS LVO/NC NFs after re-sintering in air at 600 °C for 5h.

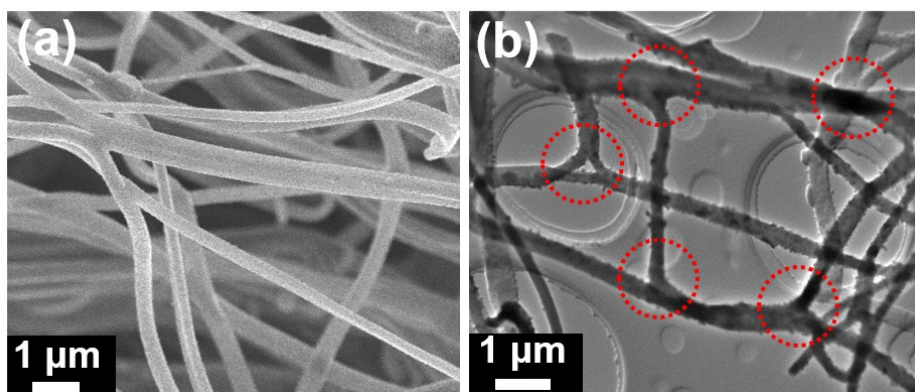

**Fig. S5** (a) Low magnification SEM image and (b) Low magnification TEM image of the SS LVO/NC NFs.

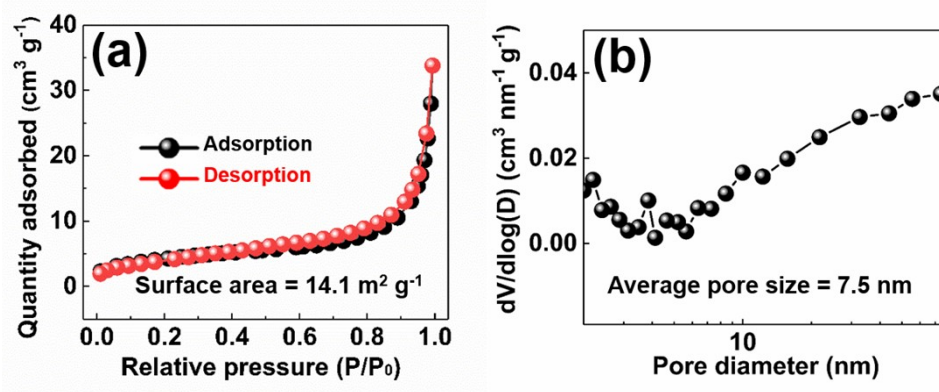

**Fig. S6** (a) N<sub>2</sub> adsorption/desorption isotherm and (b) Pore size distribution of the SS LVO/NC NFs.

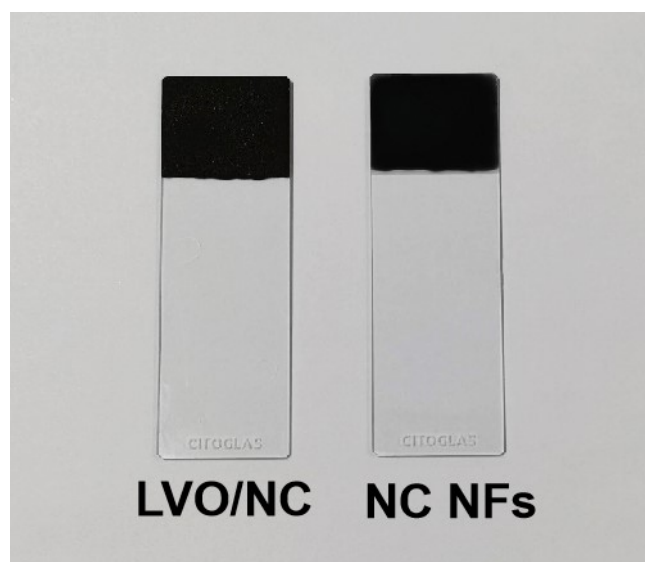

**Fig. S7** Optical Photos of LVO/NC and NC NFs films coated on glass slide.

The conductivity of the SS LVO/NC NFs, LVO/NC and NC NFs are contrastively studied via resistivity measuring instruments with four-probe array method. The SS LVO/NC NFs could be directly tested, and the LVO/NC and NC NFs powders were mixed with PVDF (dissolve in NMP) with weight ratio of 8:1 and coated on glass slide (Fig. A1) for test. As seen, the SS LVO/NC NFs electrode exhibits higher conductivity than that of the LVO/NC and NC NFs electrodes (Tab. S1).

**Tab. S1** Electrical conductivity of the SS LVO/NC NFs, LVO/NC and NC NFs electrodes measured via resistivity measuring instrument with four-probe array method.

| Electrode     | Conductivity ( $\text{S cm}^{-1}$ ) |
|---------------|-------------------------------------|
| SS LVO/NC NFs | $1.91 \times 10^{-4}$               |
| LVO/NC        | $2.08 \times 10^{-5}$               |
| NC NFs        | $1.68 \times 10^{-4}$               |

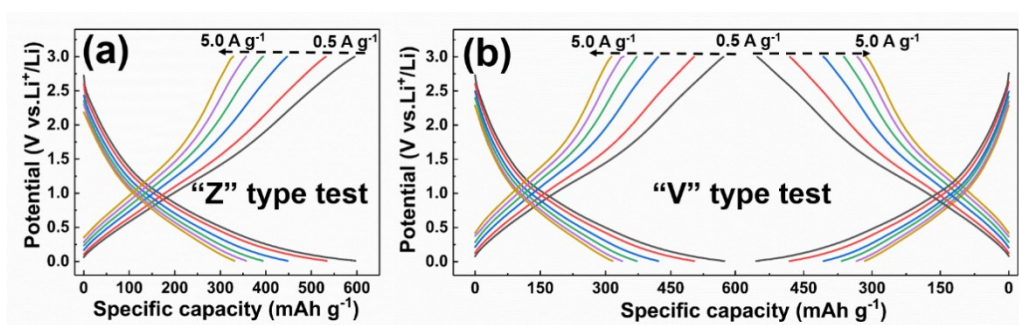

**Fig. S8** (a) Representative charge/discharge curves in the 14th period rate performance testing in Figure 4d. (b) Representative charge/discharge curves in the 8th period rate performance testing in Figure 4e.

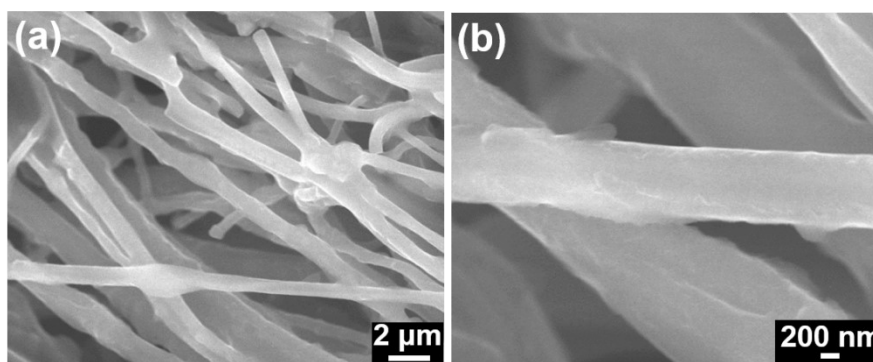

**Fig. S9** (a) Low and (b) high magnification SEM image of the SS LVO/NC NFs electrode after long cycle performance.

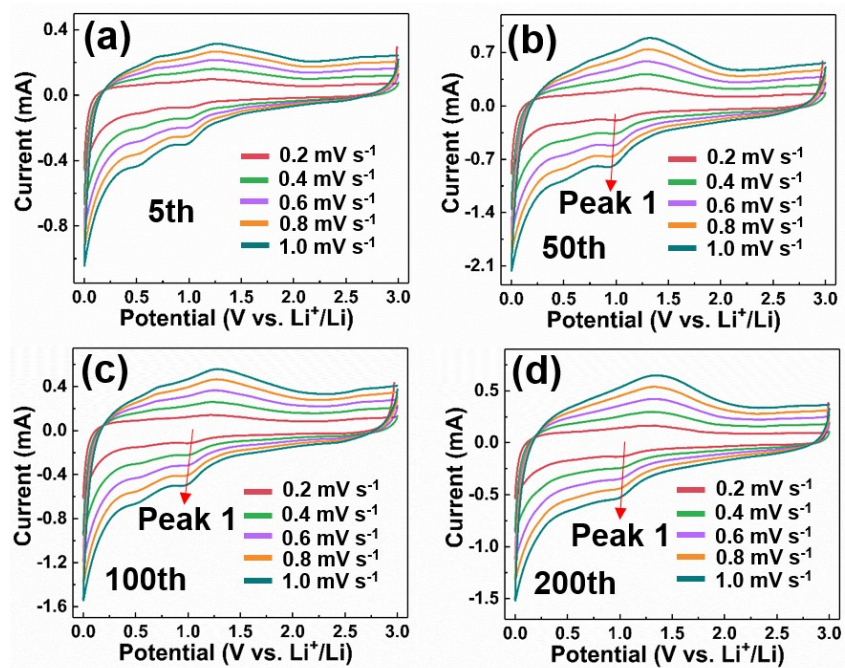

Fig. S10 (a-d) CV curves with varied scan rates.
